# Supplementary material for: Design of an optimal combination therapy with broadly neutralizing antibodies to suppress HIV-1
Source: eLife journal article supplement (doi:10.7554/elife.76004), 2022-07-04

No recombination  
No selective sweeps

High diversity ( $\theta = 0.1$ )

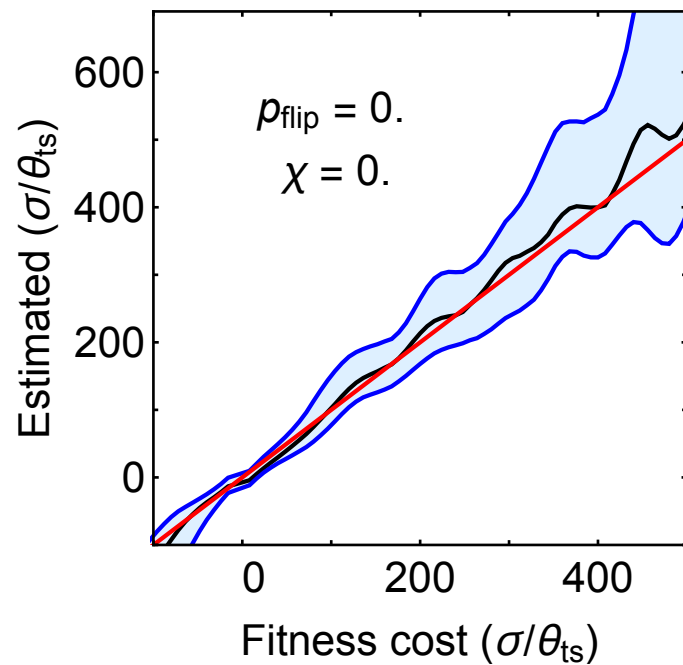

Selective sweeps  
No Recombination

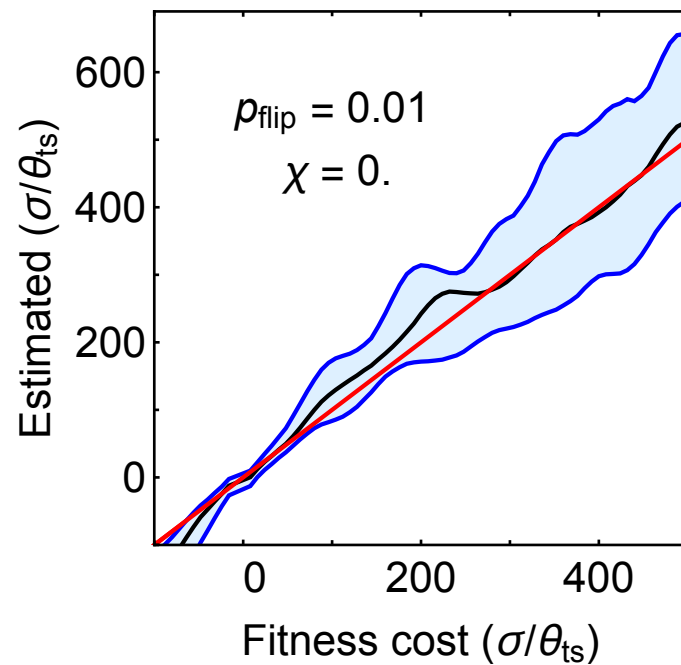

Selective sweeps  
High Recombination

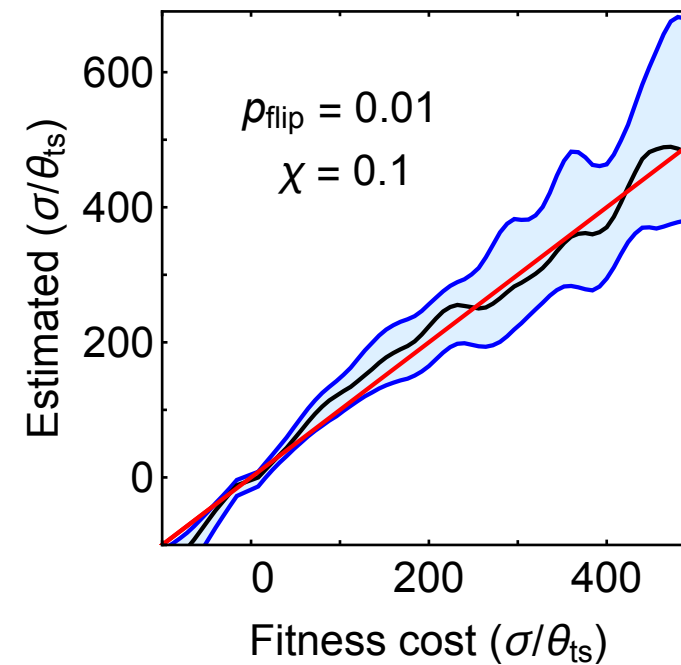

Low diversity ( $\theta = 0.01$ )

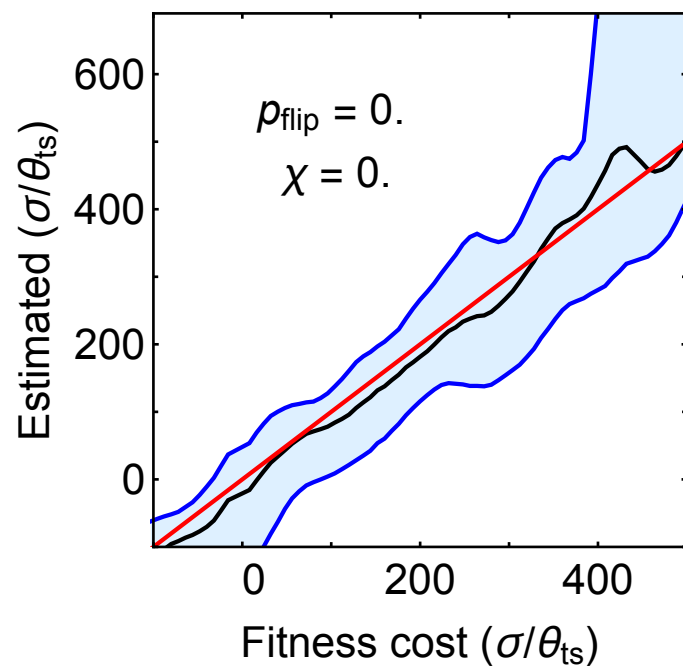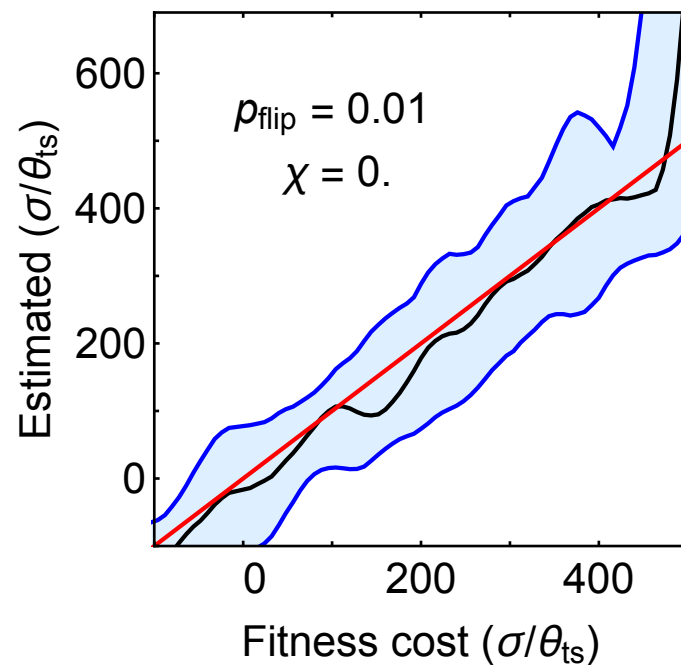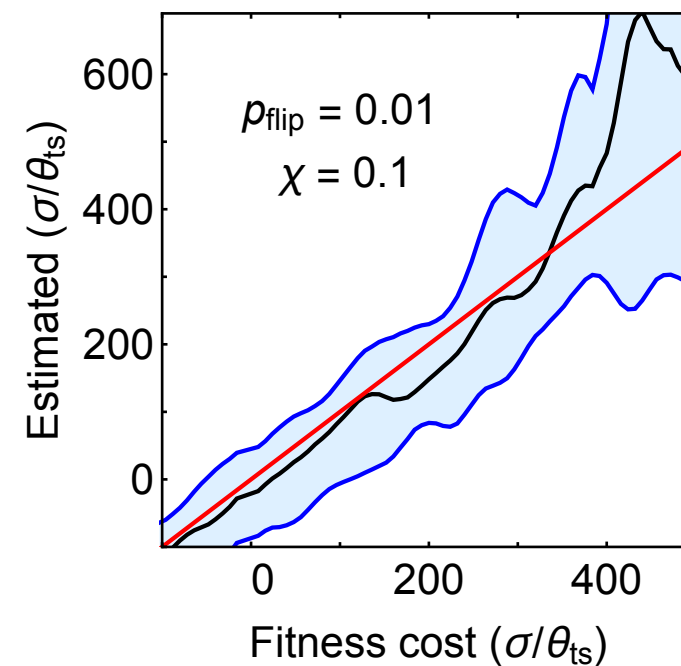

Supplement: supp [file elife-76004-supp-v1.zip]
