# Supplementary figures and images for: Design of an optimal combination therapy with broadly neutralizing antibodies to suppress HIV-1
Source: eLife journal article supplement (doi:10.7554/elife.76004), 2022-07-04

# Low dose cohort

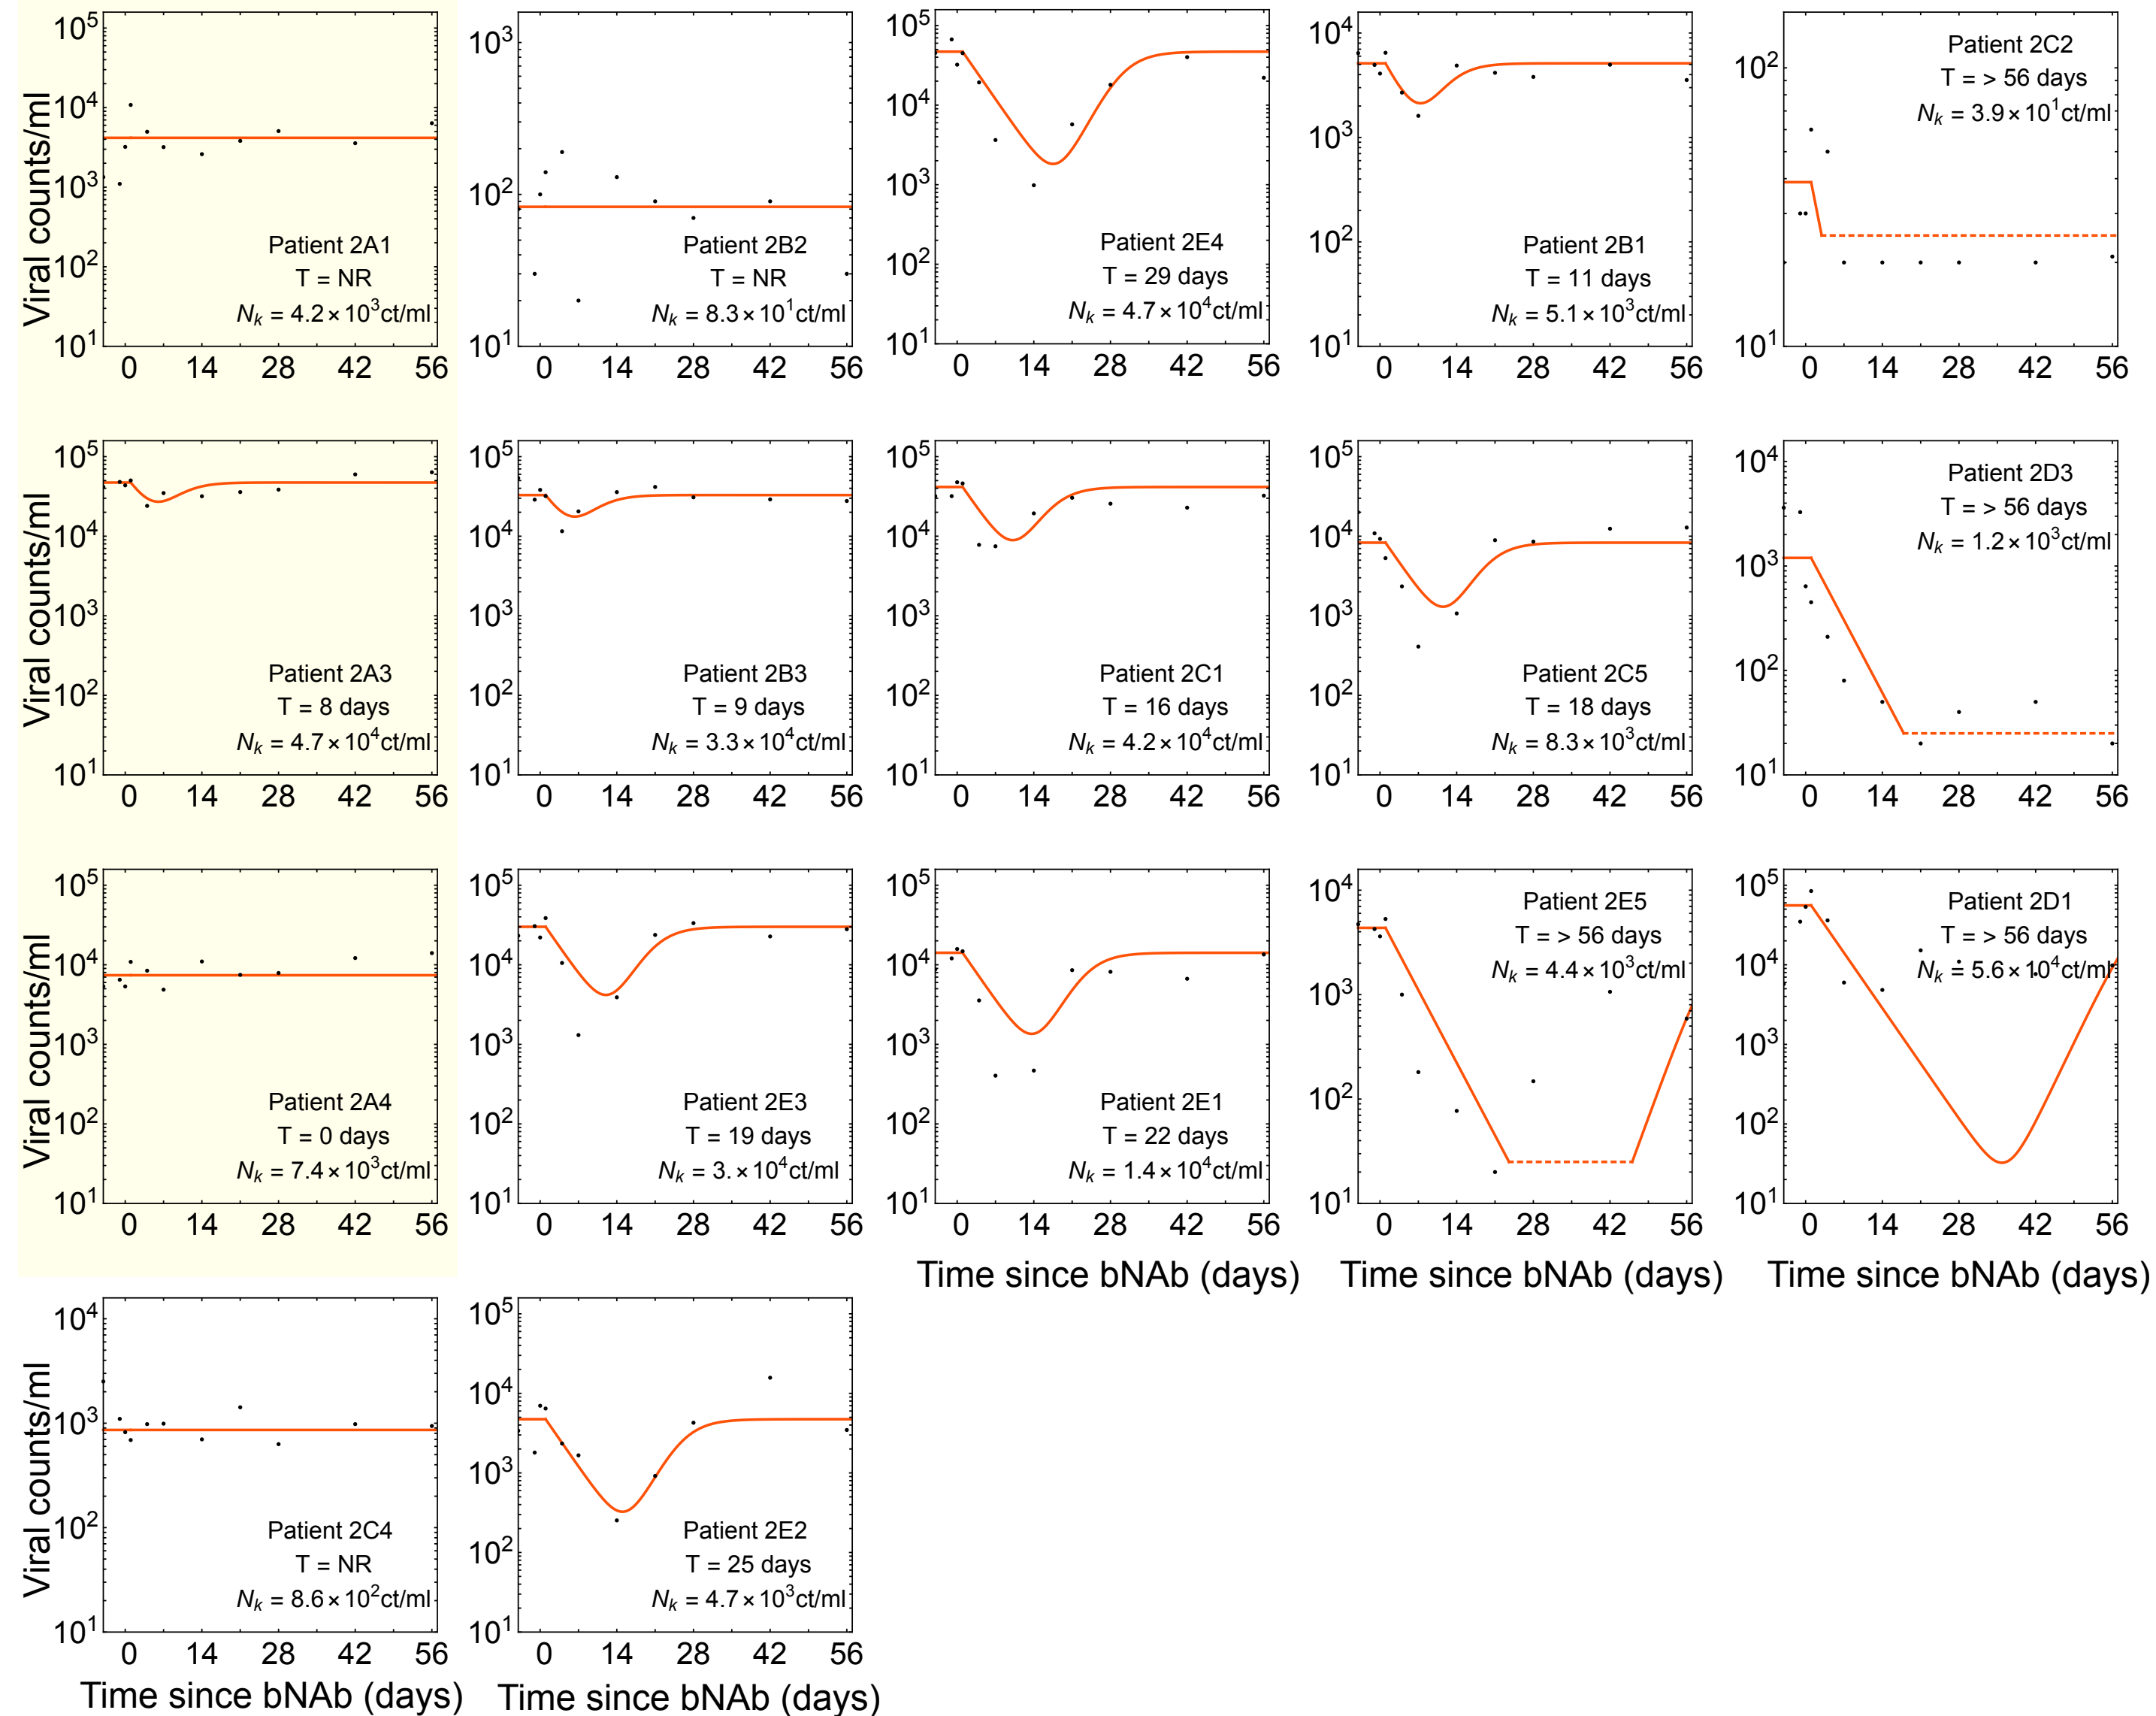

Supplement: supp [file elife-76004-supp-v1.zip]

**(A)**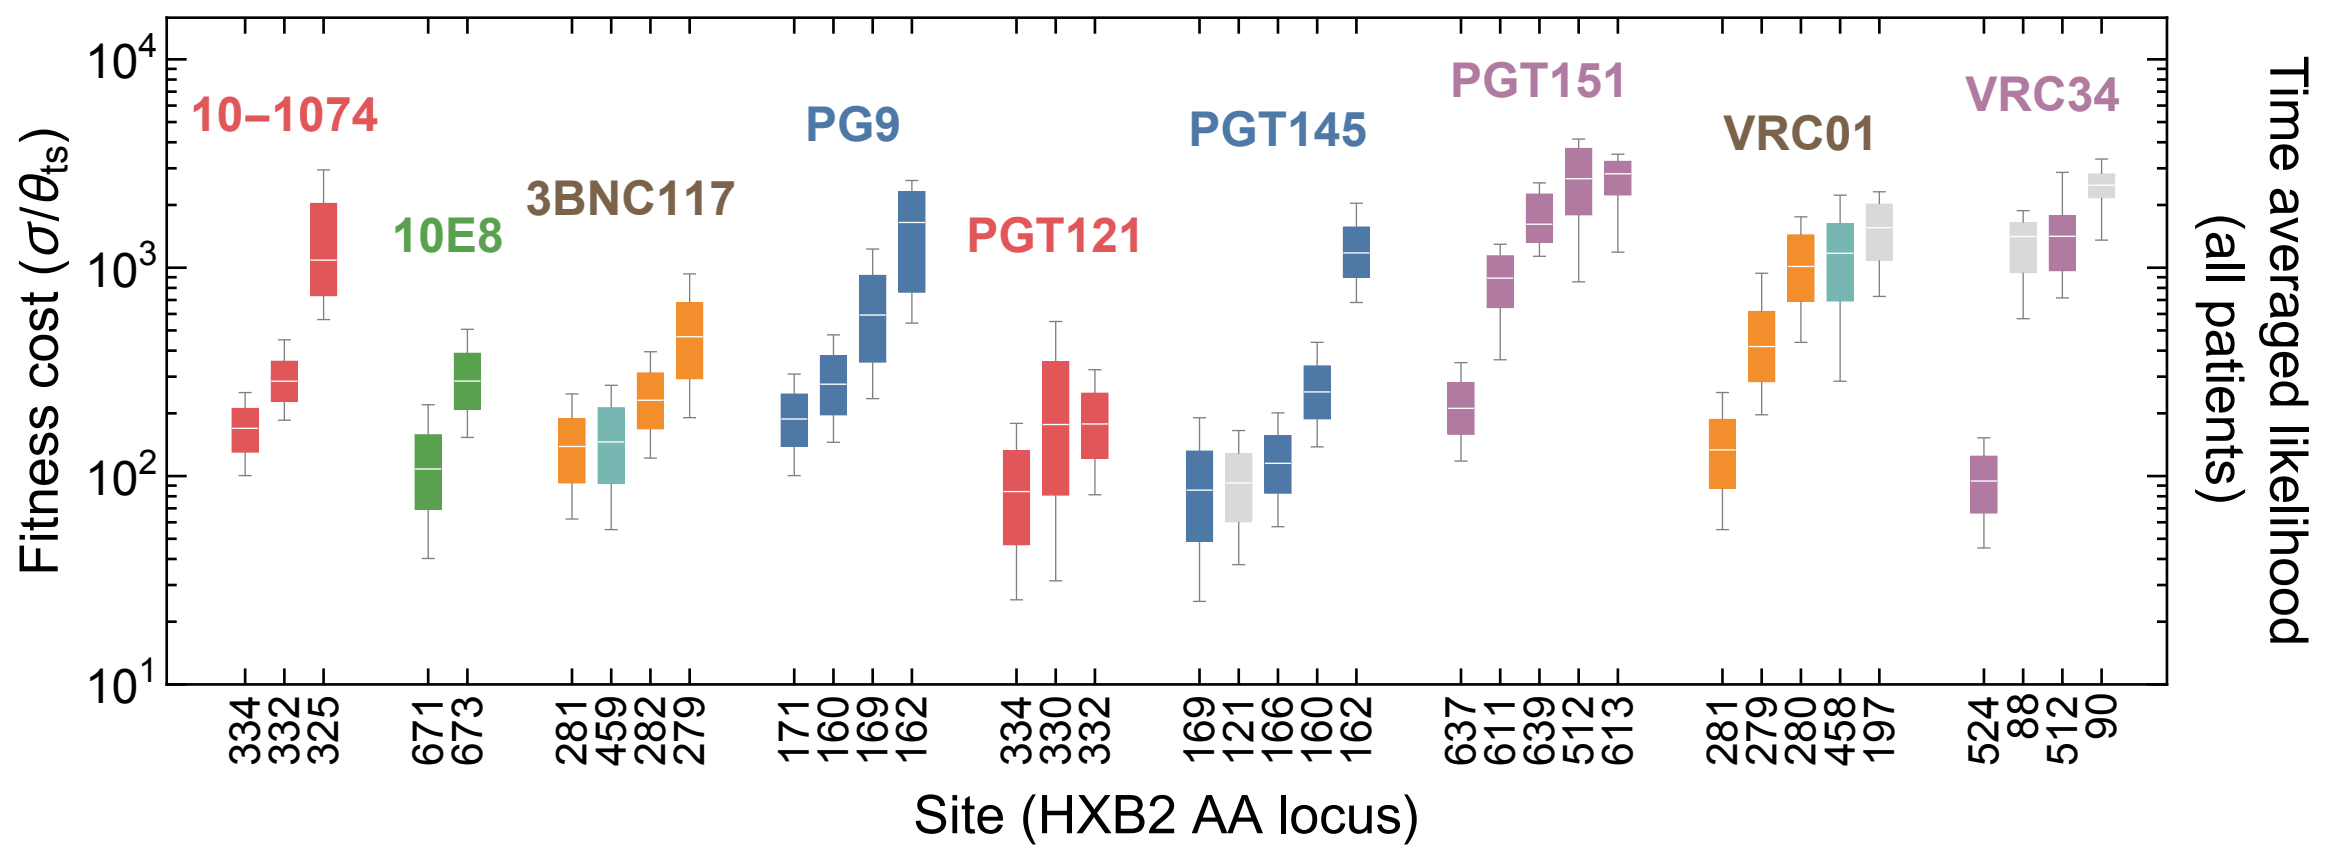**(B)**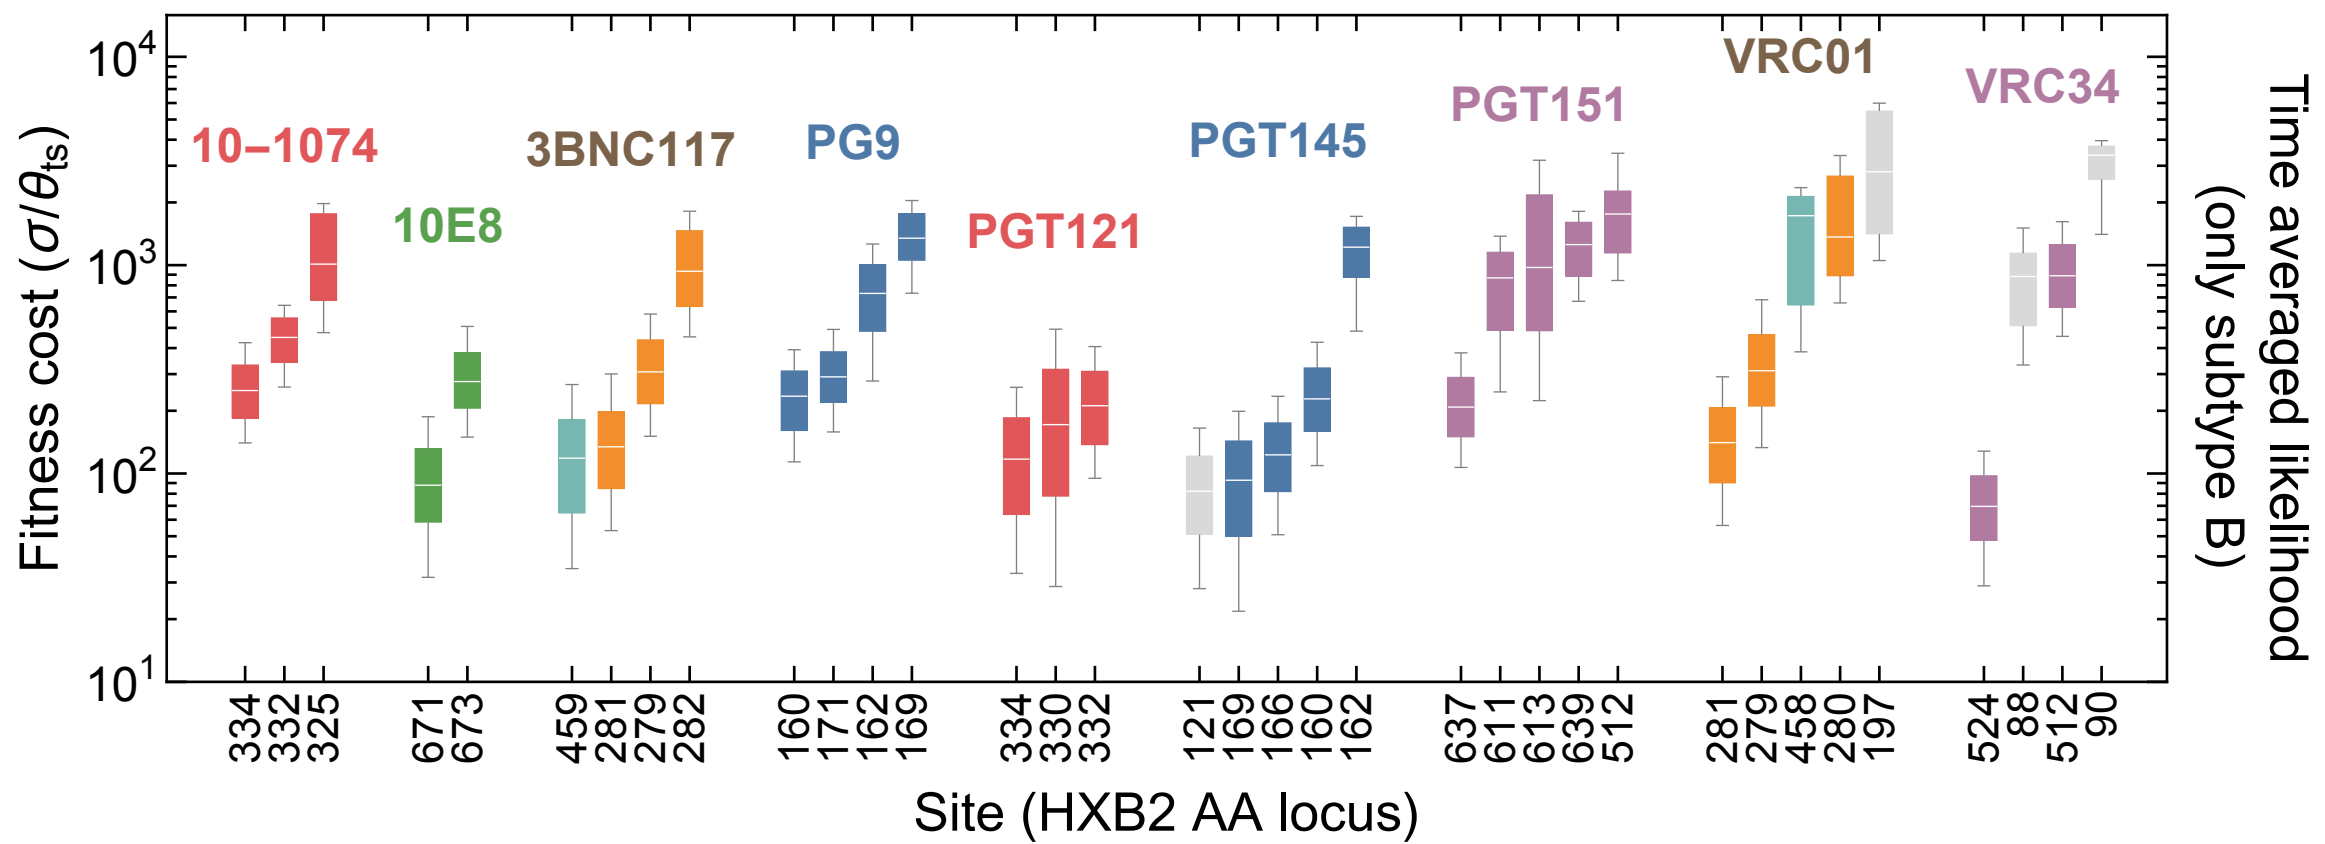**(C)**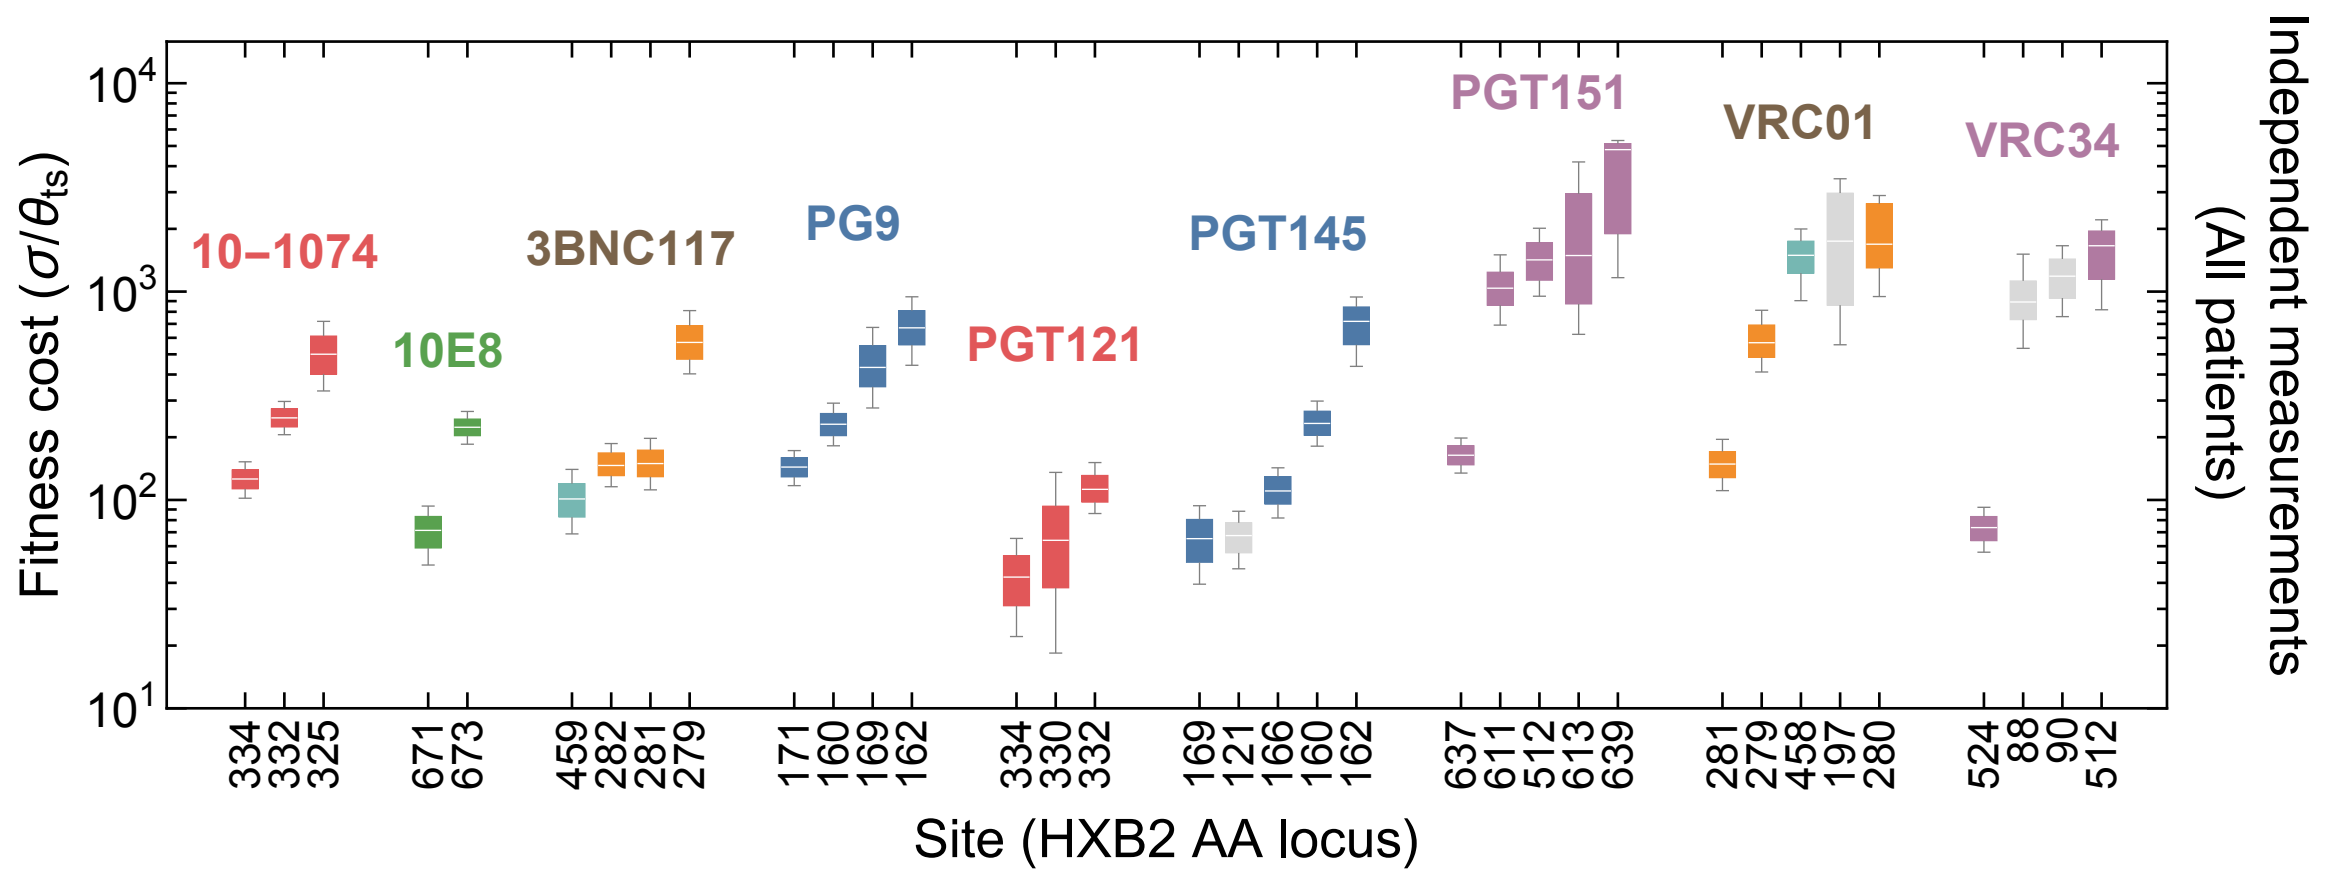

Supplement: supp [file elife-76004-supp-v1.zip]

**(A)**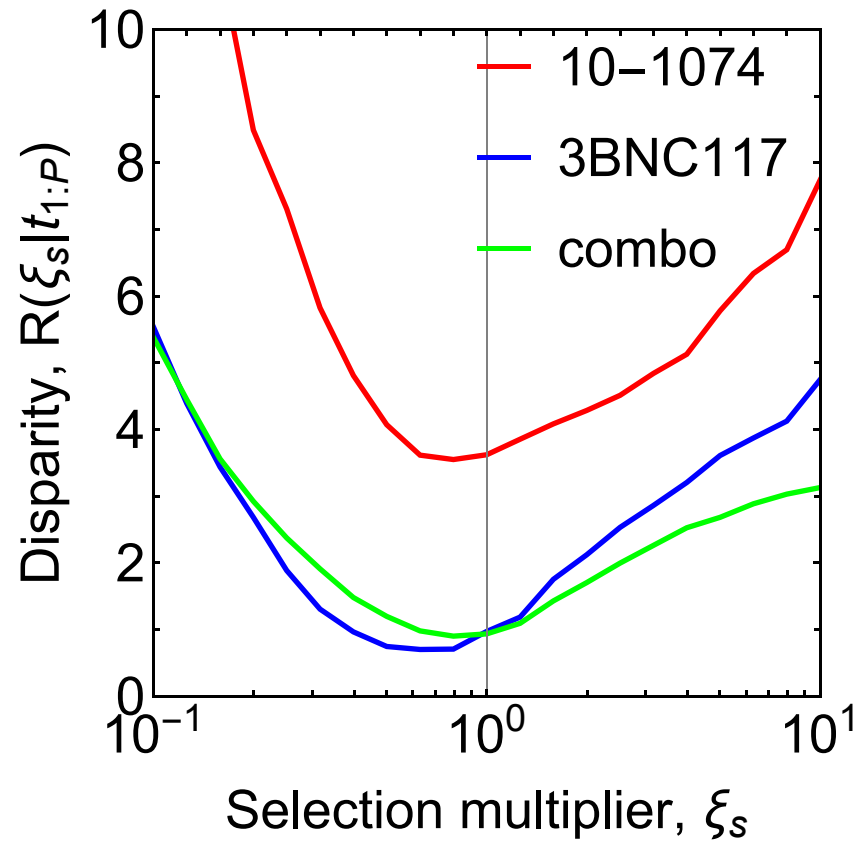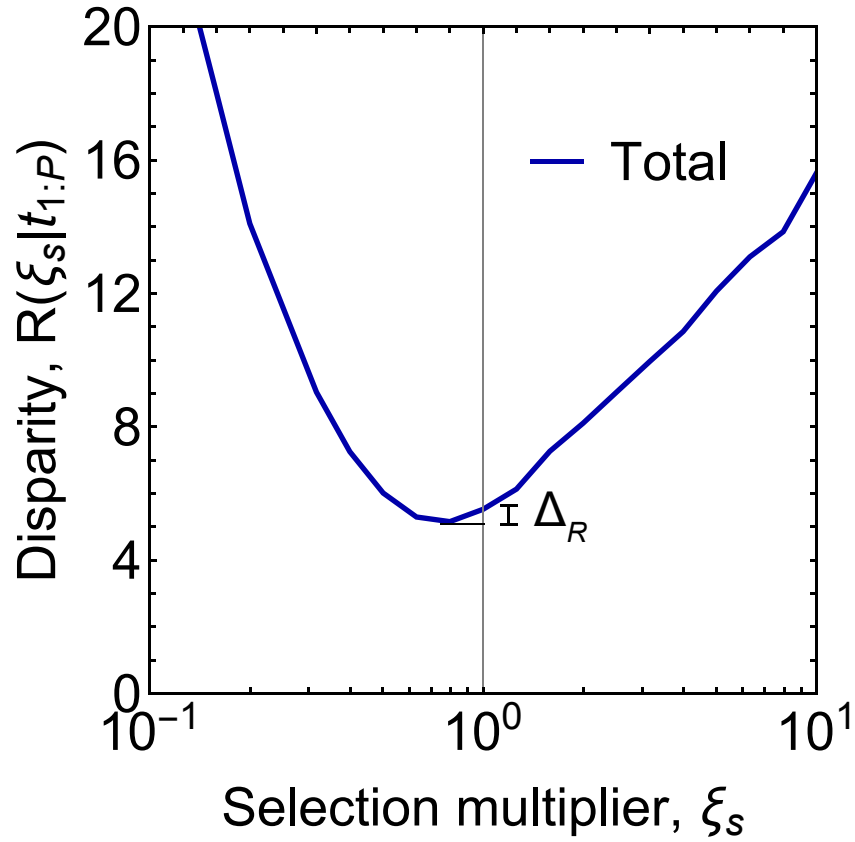**(B)**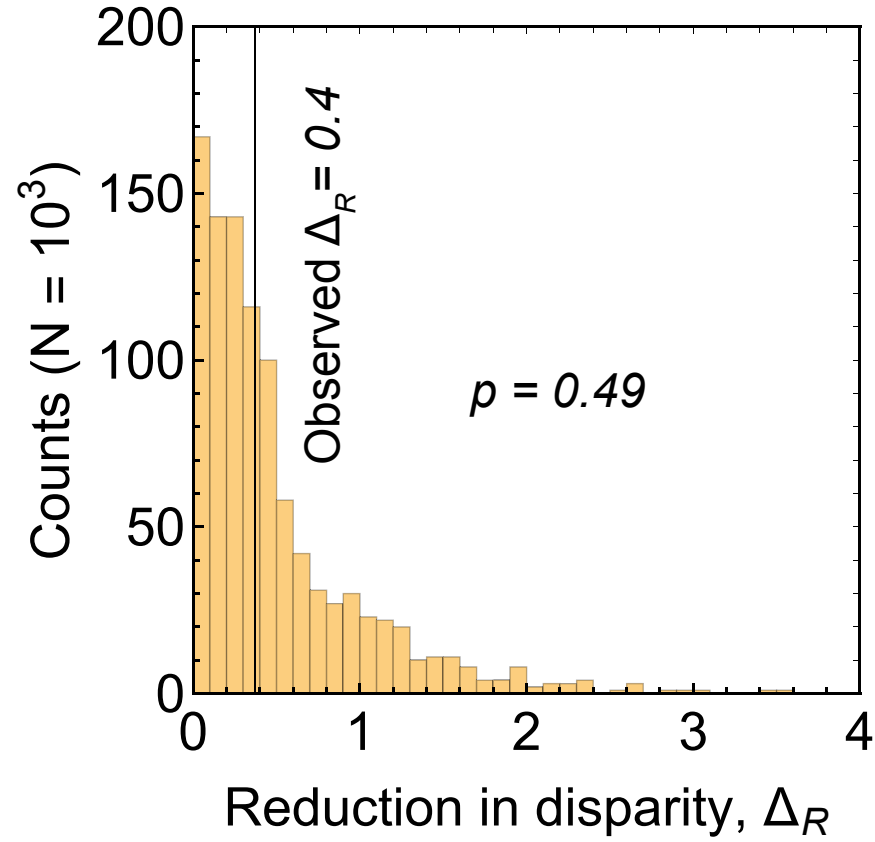

Supplement: supp [file elife-76004-supp-v1.zip]

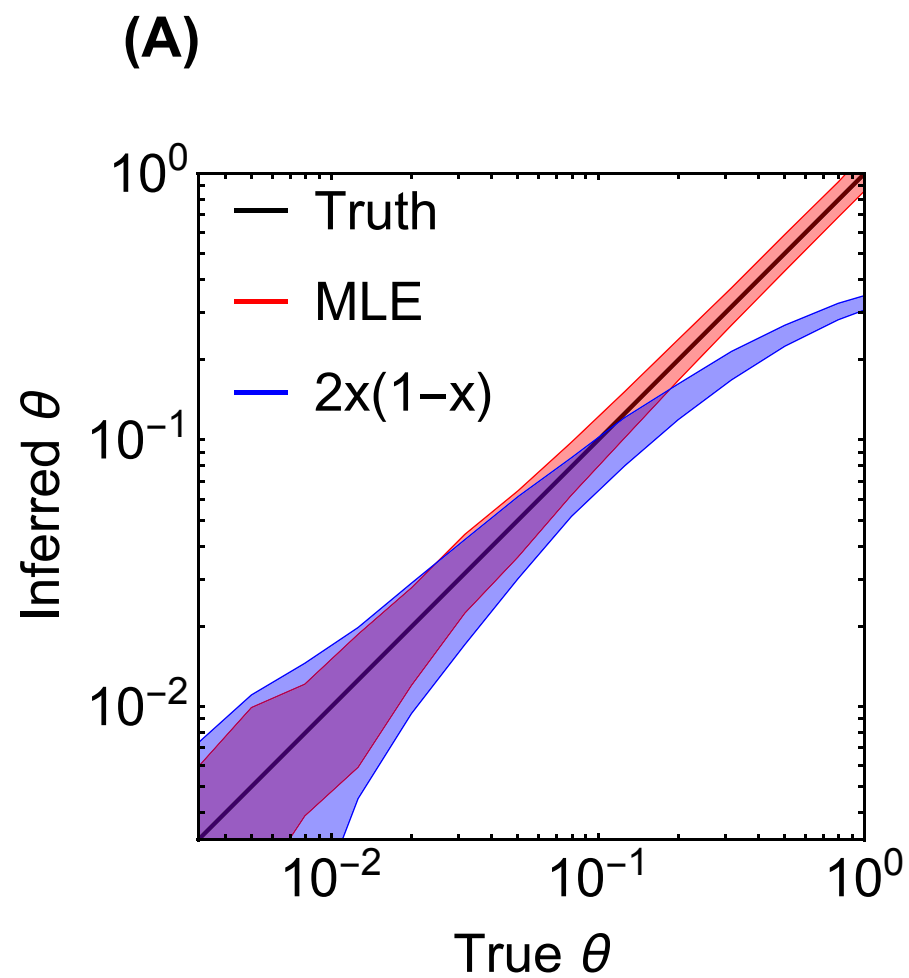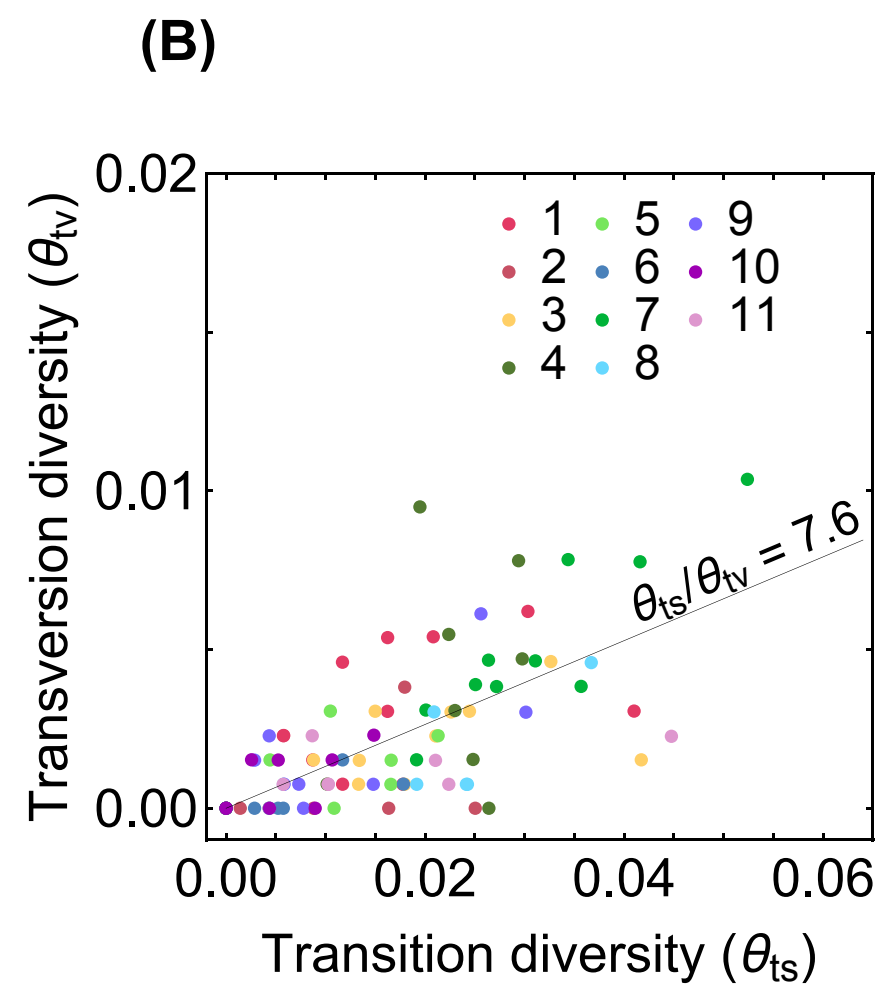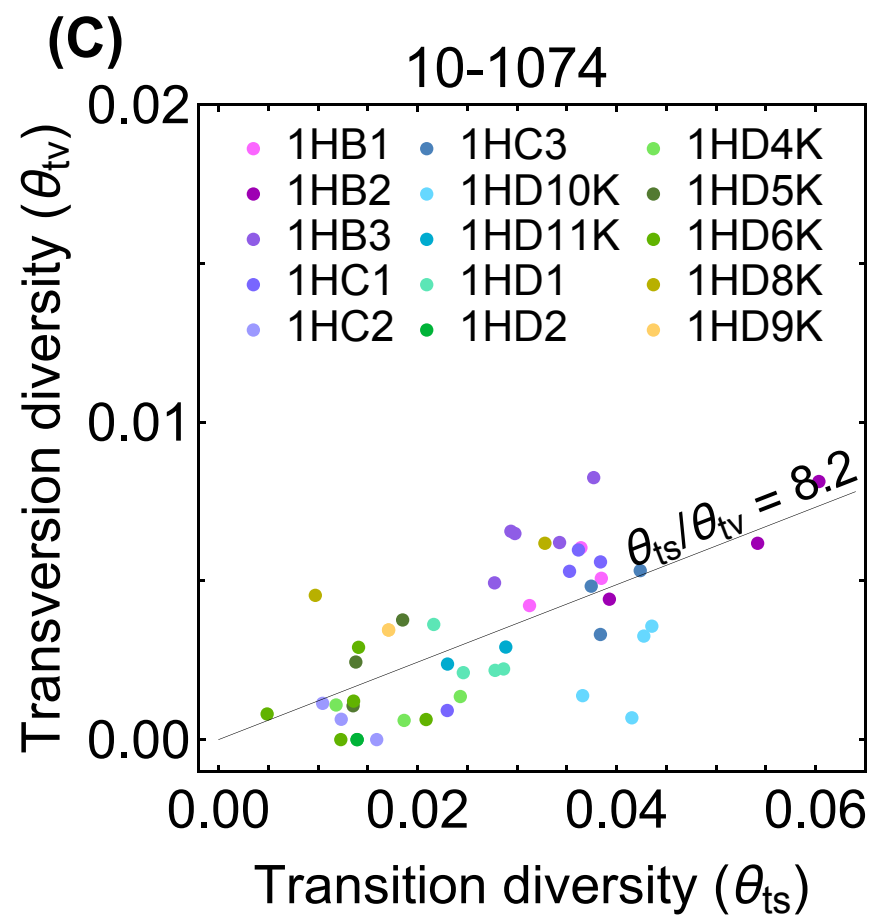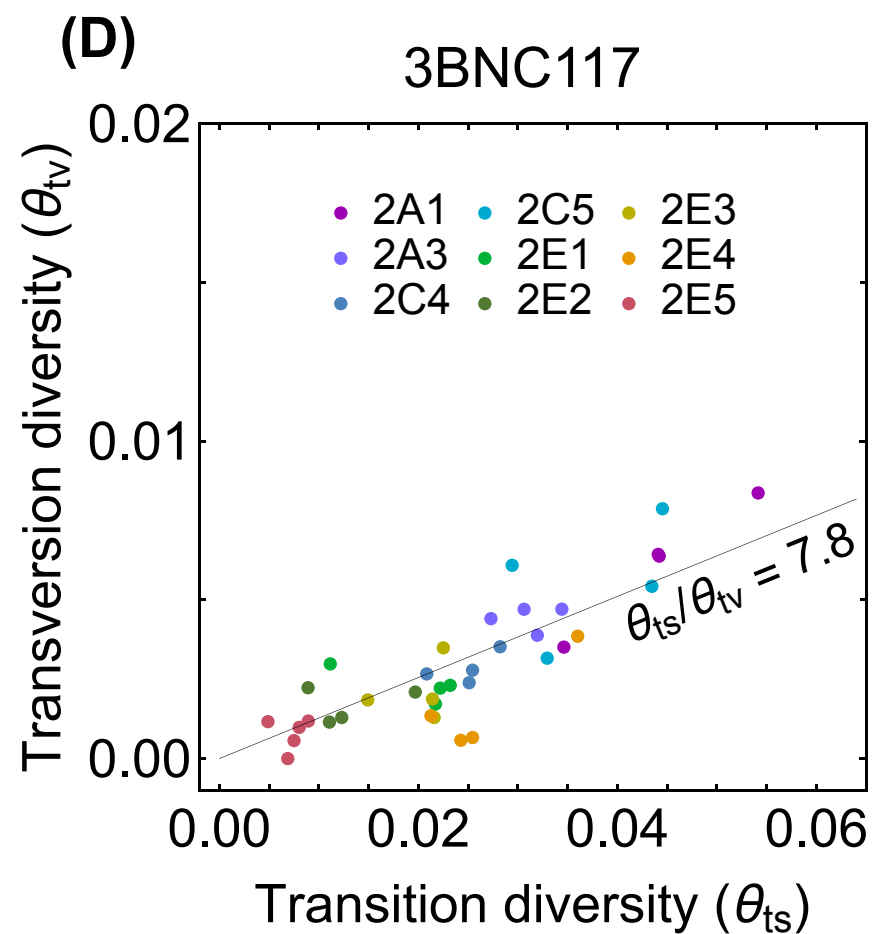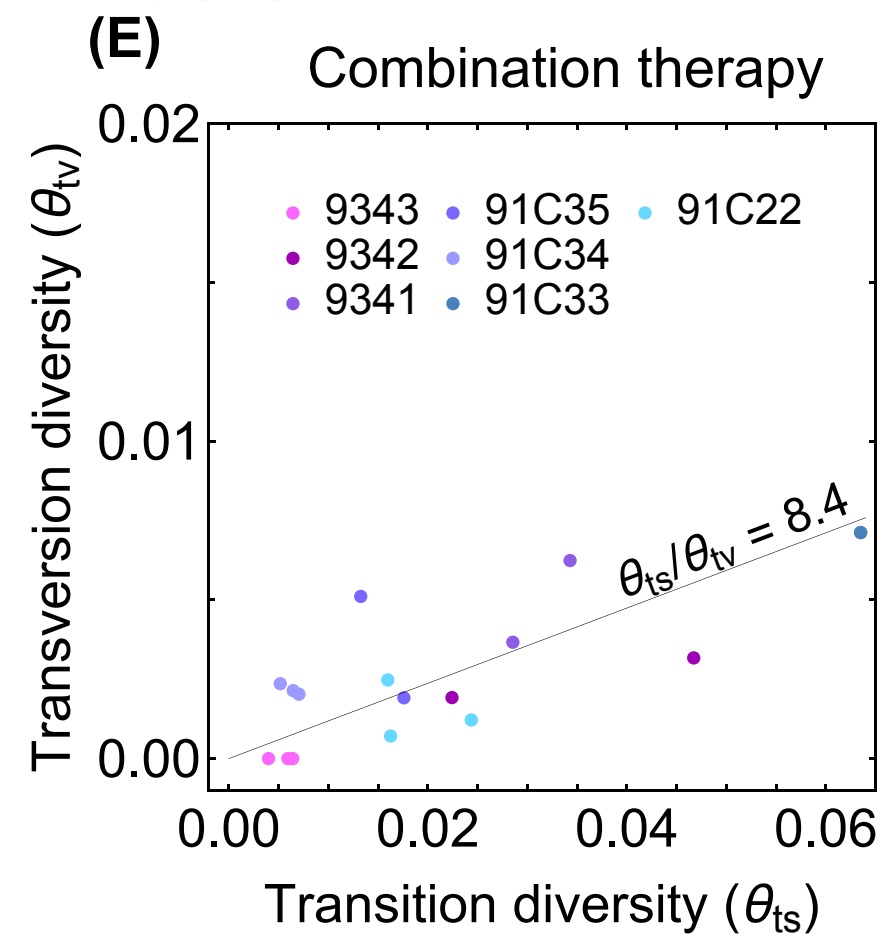

Supplement: supp [file elife-76004-supp-v1.zip]

**(A)**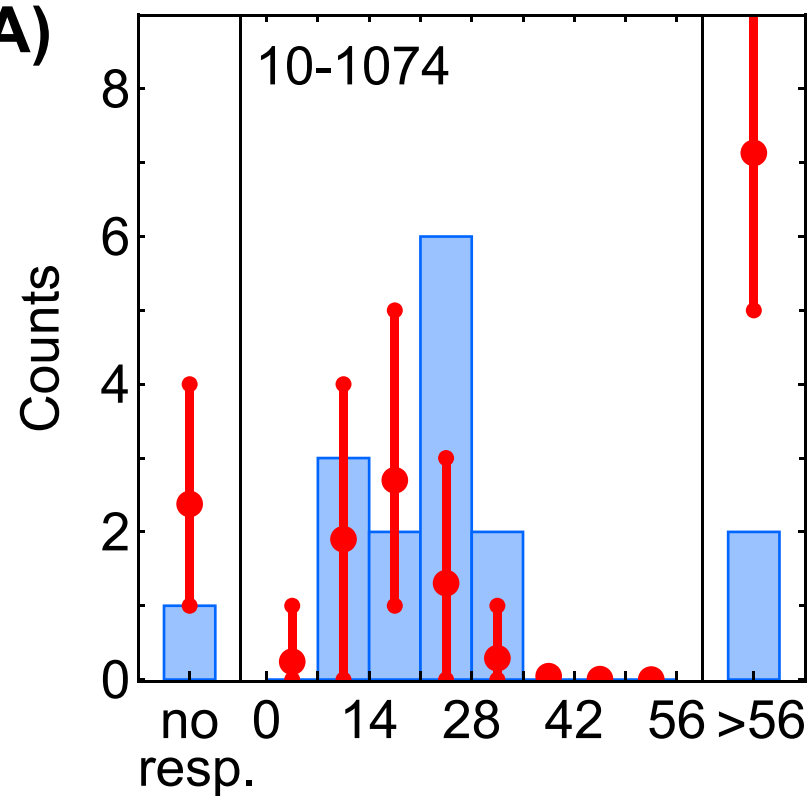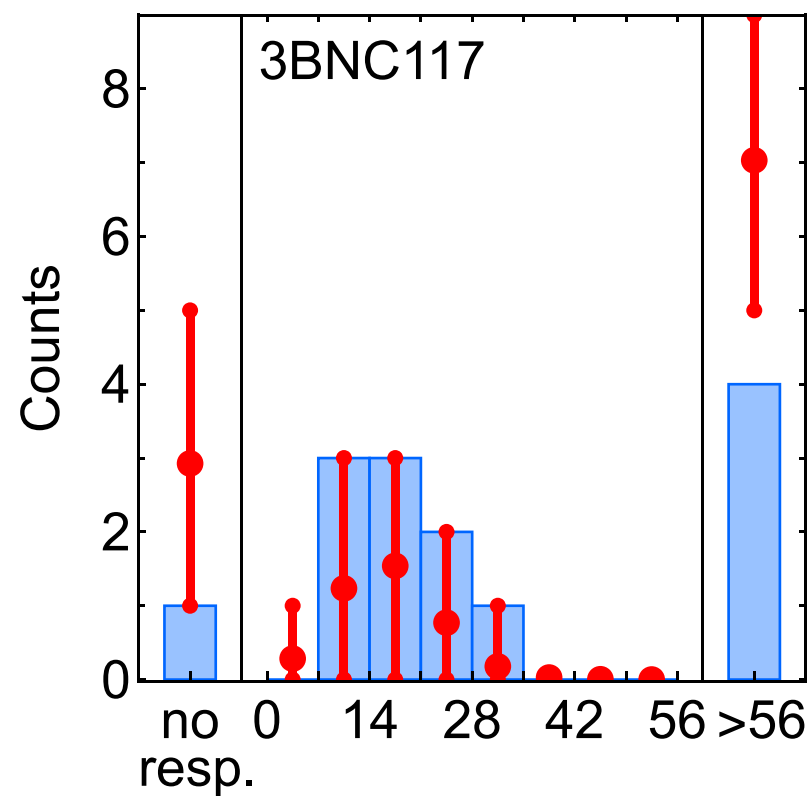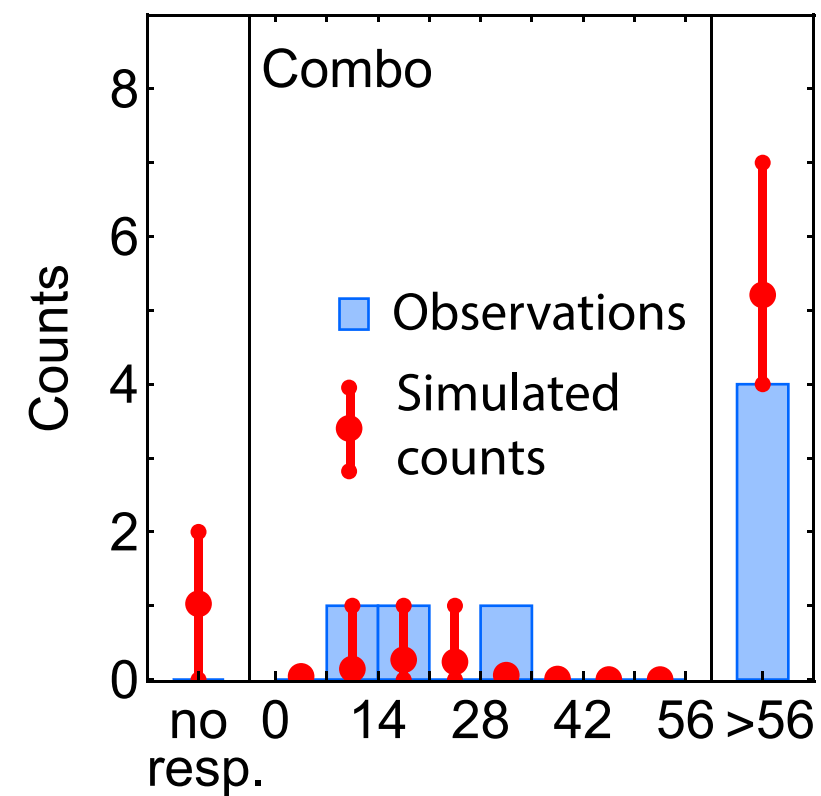**(B)**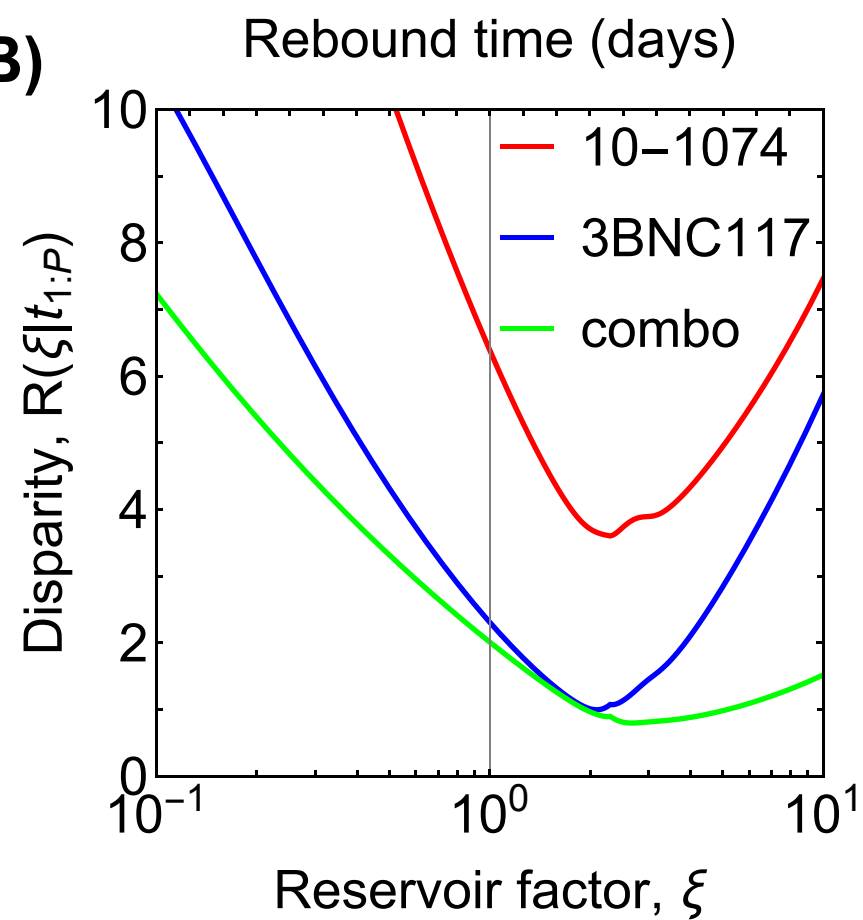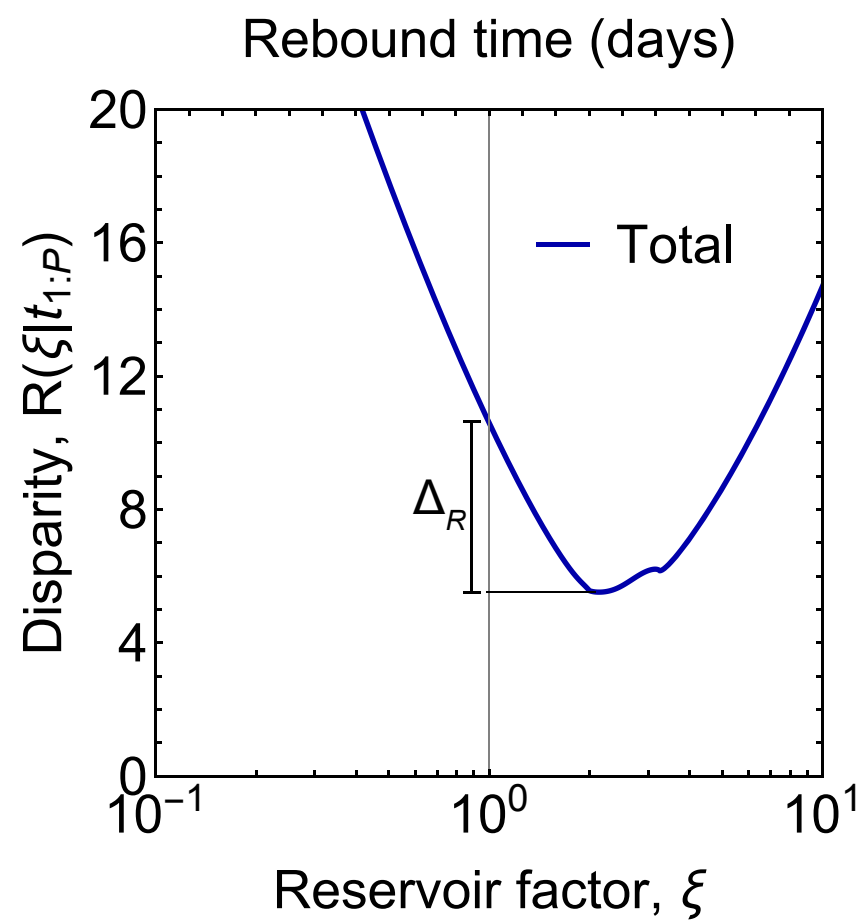**(C)**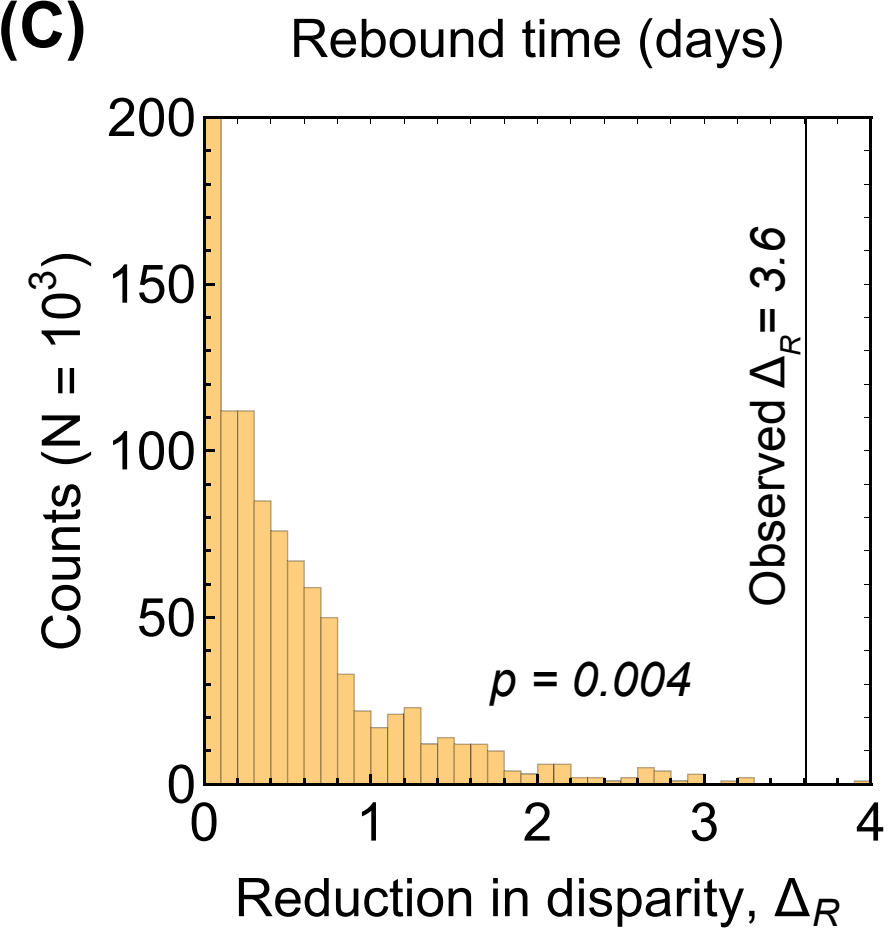

Supplement: supp [file elife-76004-supp-v1.zip]

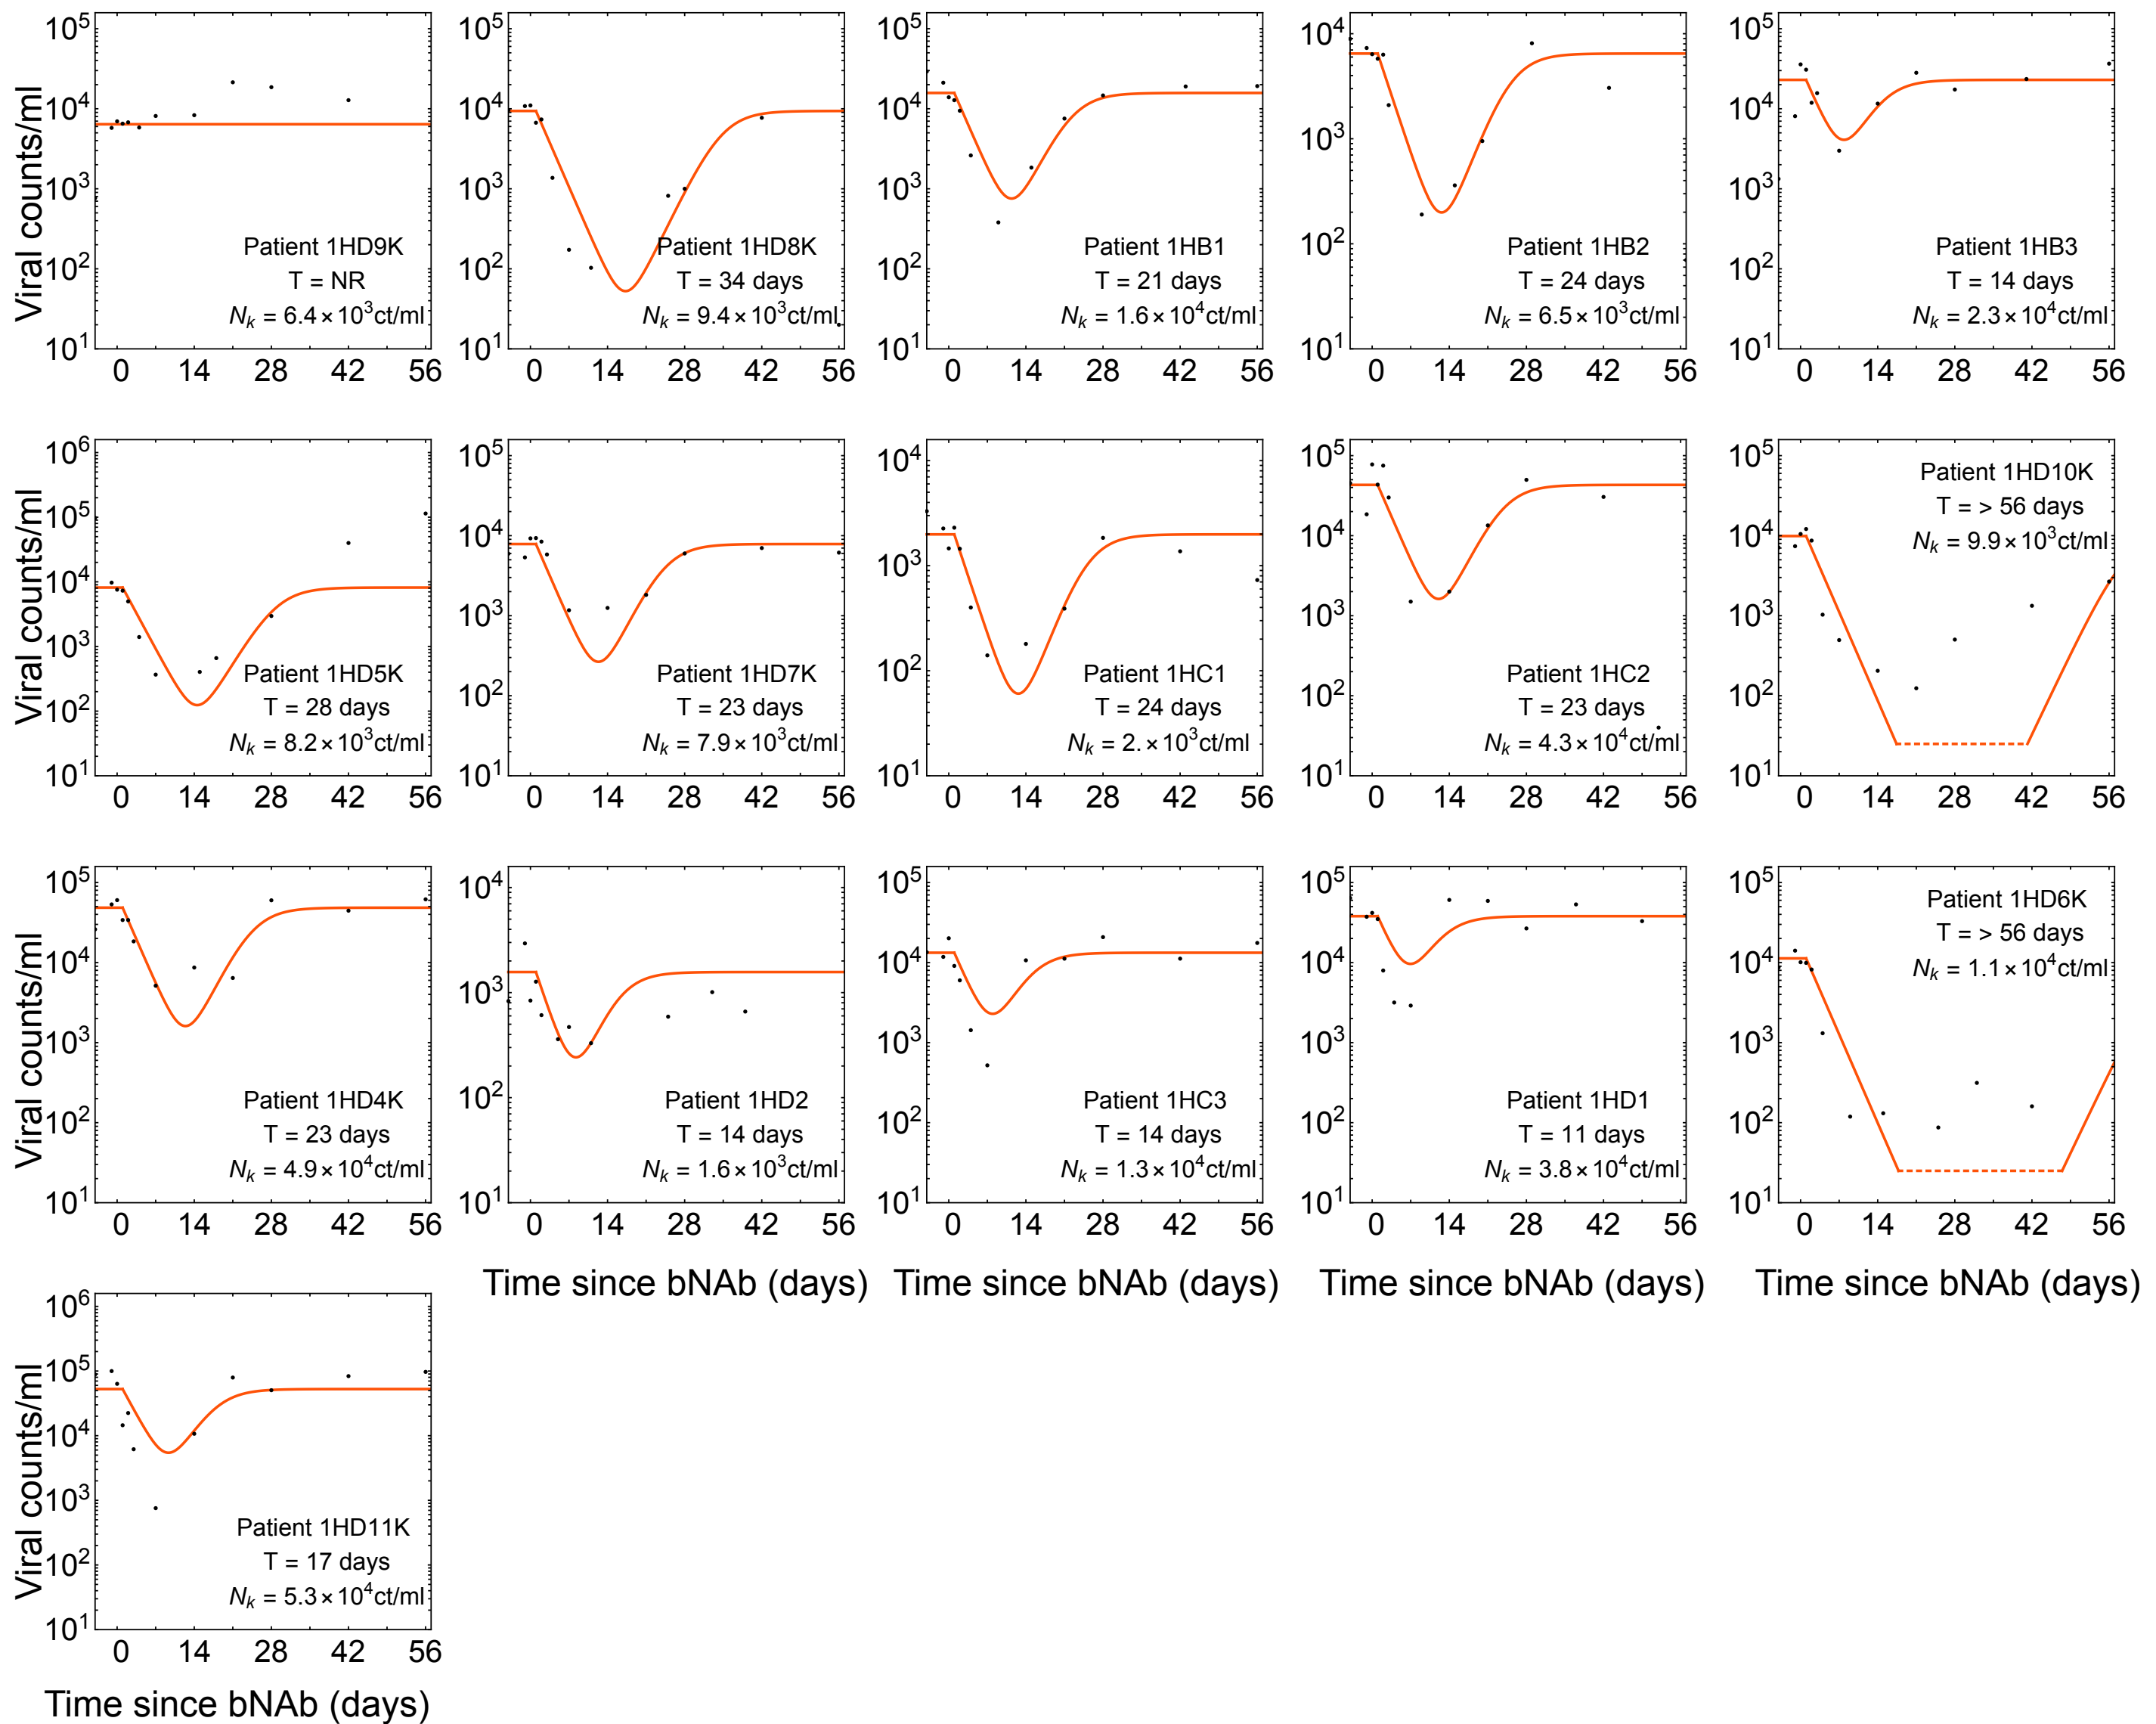

Supplement: supp [file elife-76004-supp-v1.zip]

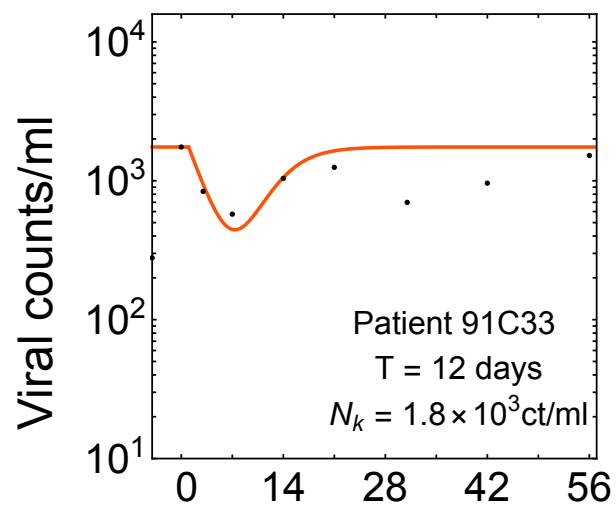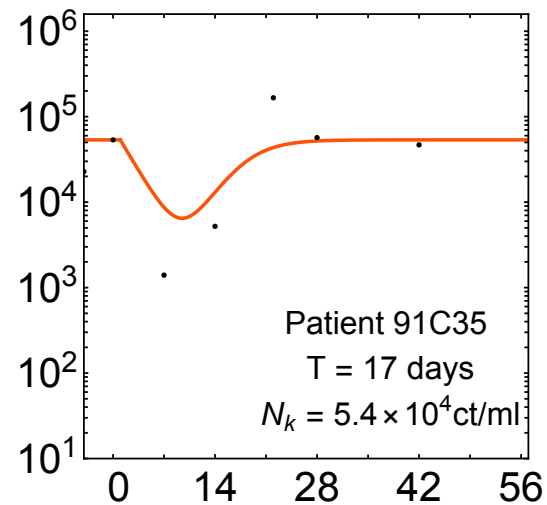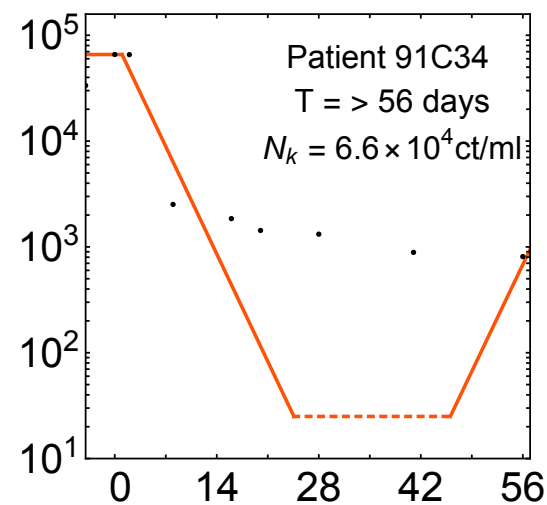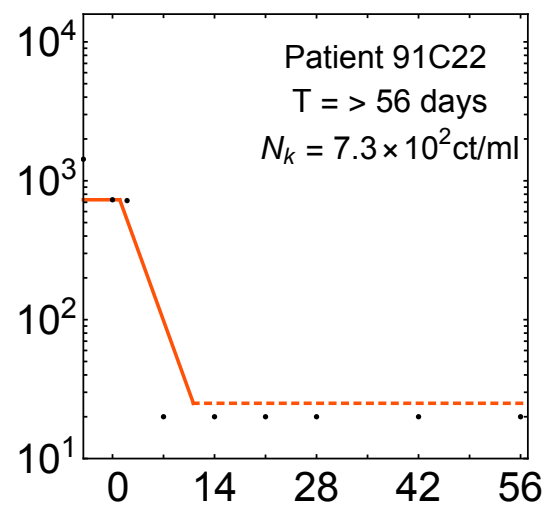

Time since bNAb (days)

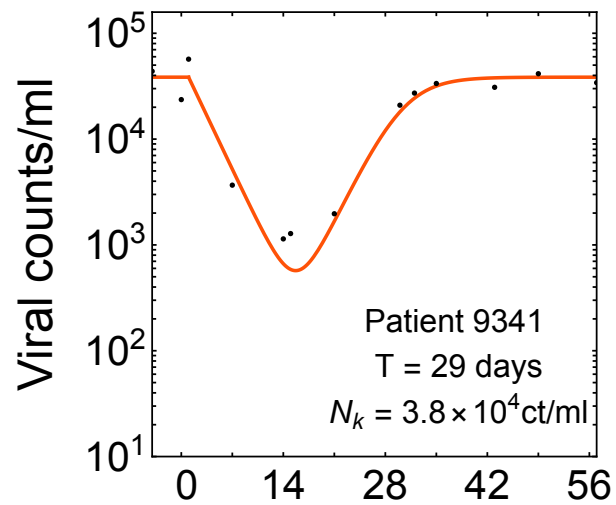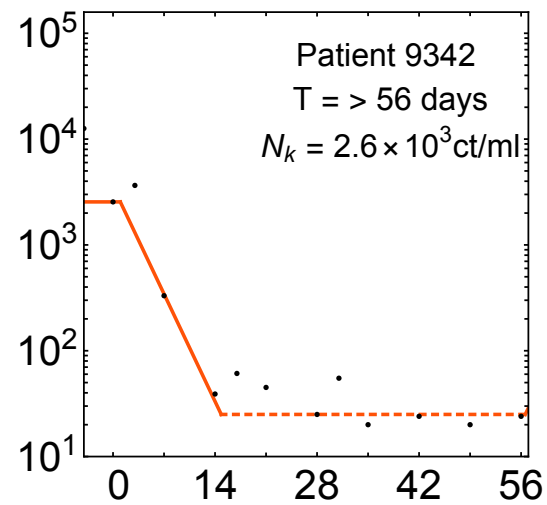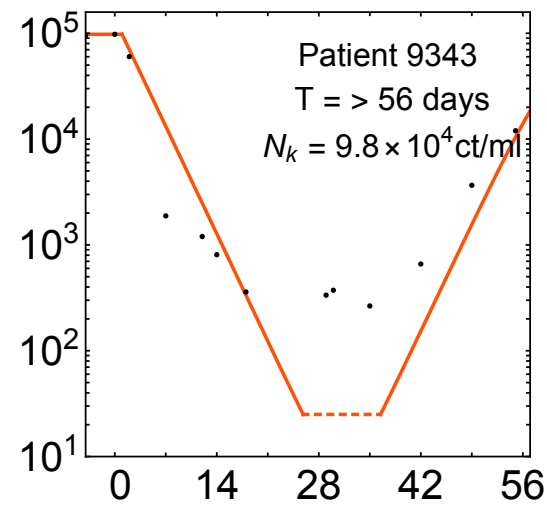

Time since bNAb (days)

Time since bNAb (days)

Time since bNAb (days)

Supplement: supp [file elife-76004-supp-v1.zip]
